# Supplementary material for: Optimizing Ceria Promotion in Ni-Based Molecular Sieve Catalysts for Enhanced Hydrogen Production via Methane Partial Oxidation
Source: Research Square preprint supplement (doi:10.21203/rs.3.rs-6680604/v1), 2025-05-21
Supplement: Supplementary file 1 [file 0f0bc8d053bc15648242d198.docx]

Article

Optimizing Ceria Promotion in Ni-Based Molecular Sieve Catalysts for Enhanced Hydrogen Production via Methane Partial Oxidation

Abdulaziz Al-Anazi1, Amal BaQais2, Kenit Acharya3, Ahmed I. Osman4*, Omer Bellahwel1, Ahmed A. Ibrahim1, Fekri Abdulraqeb Ahmed Ali5, Salwa B. Alreshaidan6, Ahmed E. Abasaeed1, Changseok Han7, Rawesh Kumar8*, and Ahmed S. Al-Fatesh1*

1Chemical Engineering Department, College of Engineering, King Saud University (KSU), P.O. Box 800, Riyadh 11421, Saudi Arabia

2Department of chemistry, College of science, Princess Nourah bint Abdulrahman University, P.O. Box 84428, Riyadh 11671, Saudi Arabia.

3Department of Chemistry, Indus University, Ahmedabad, Gujarat,382115, India

4School of Engineering, Technology, and Design, Canterbury Christ Church University, Canterbury, CT1 1QU, UK

5Chemical Engineering Department, Imam Mohammad Ibn Saud Islamic University (IMSIU), Riyadh 11432, Saudi Arabia

6Department of Chemistry, Faculty of Science, King Saud University (KSU), P.O. Box 800, Riyadh 11451, Saudi Arabia

7Program in Environmental and Polymer Engineering, Graduate School, INHA University, Incheon 22212, Korea

8Department of Chemistry, Patna Science College, Patna University, Bihar, 800005, India;

* Correspondence: [ahmed.osman@canterbury.ac.uk](mailto:ahmed.osman@canterbury.ac.uk); kr.rawesh@gmail.com ; [aalfatesh@ksu.edu.sa](mailto:aalfatesh@ksu.edu.sa)

## S1. Catalyst characterization

The surface area-porosity of catalysts is analyzed by Micromeritics Tristar II 3020 characterized where surface area and pore size are estimated using the Brunauer-Emmet-Teller method and BJH method. X-ray powder diffraction patterns for the samples are recorded on a Bruker D8 Advance (Bruker, Billerica, MA, USA) by using Cu Kα (λ = 0.15406 nm) radiation source and a nickel filter. The present phases were documented using standard powder XRD cards (JCPDS). A laser Raman (NMR-4500) Spectrometer (JASCO, Japan) is used to obtain Raman spectra of the catalyst samples. The wavelength of the excitation beam was set to 532 nm. The laser intensity was adjusted to 1.6 mW for 10 seconds of exposure time at 3 accumulations. The Raman spectra are processed by using Spectra Manager Ver.2 software (JASCO, Japan). IR-Fourier transform infrared (FTIR) spectra are recorded by employing IR Prestige-21 SHMADZU. The weight loss % profile of spent catalysts is assessed by thermal gravimetric analysis (TGA) under air by using a Shimadzu TGA-51. Automatic chemisorption equipment (Micromeritics Auto Chem II 2920, USA) is used to study the H2-temperature programmed reduction (H2-TPR) and O2-temperature programmed oxidation (O2-TPO) with 0.05 g sample. For H2-TPR, 70 mg of the sample is subjected to a heat treatment at 10 °C/min up to 900 °C under atmospheric pressure and gas flow (40 ml/min) of 10% H2/Ar mixture. Before TPO analysis, the catalyst sample was treated in situ by purging with nitrogen at 300°C for 0.5 h and then cooled down to room temperature. After that, a flow of 10 vol. % oxygen in nitrogen was introduced as the oxidation gas, and the reactor was heated from room temperature to 900°C at a ramp of 10°C/min to get the TPO profiles. For CO2-TPD, 70 mg of the sample was first kept at 200°C for 1 hr under helium (He) flow to remove physically adsorbed species from the catalyst surface. Then, CO2 adsorption was accomplished at 50°C for 30 min by passing 10% CO2/He mixture gas with a flow rate of 30 ml/min. Then, the CO2 desorption signal was recorded by TCD with a linear increase in temperature up to 900°C with a temperature ramp rate of 10°C/min. The morphology of the catalysts was captured via a 120 kV JEOL JEM-2100F transmission electron microscope (TEM).

## S2. Catalyst activity test

The calcined catalysts are crushed into fine powder. The partial oxidation of methane is carried out over a 0.1 g catalyst in a tubular stainless-steel fixed bed reactor (PID Eng. & Tech, 9 mm I.D.). The cylindrical furnace located near the catalyst bed provides the temperature needed for the catalytic reaction. A K-type thermocouple monitors the temperature at the catalyst bed. For generating active sites before partial oxidation of methane, a reductive pre-treatment of the catalyst is carried out under hydrogen at 30 mL/min flow rate for 1 h at 700°C. In the target of optimum reduction of NiO, the reductive pre-treatment temperature is set at 700 °C. Further, to remove the hydrogen gas from the catalyst bed, the reactor was purged with N2. Then, the temperature of the reactor is stabilized at 600 °C for the POM reaction. The reaction gas mixture consists of 50% CH4, 25% O2, and 25% N2 gases that are allowed to pass through the packed catalyst bed at a total feed rate of 24 mL/min and space velocity of 14400 mL/h/gcat. The product is analyzed by a gas chromatograph (GC-Shimadzu-2014) equipped with a propak Q column, molecular sieve columns, and a thermal conductivity detector. The composition of effluent gases was calculated by the normalization method, and the equations for the determination of CH4 conversion, CO2 yield, H2 yield, and H2/CO ratio are used as follows:

(1)

(2)

(3)

CO2 (%)= (4)


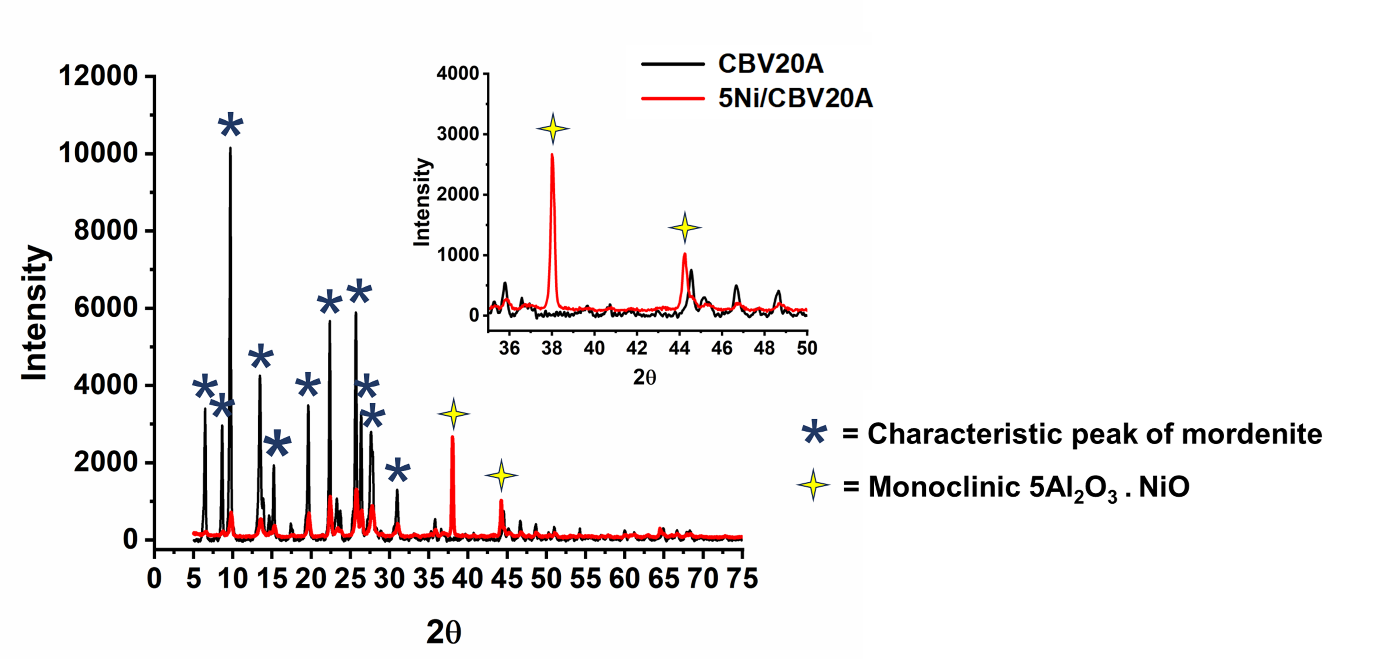


Fig. S1 X-ray diffraction pattern of CBV20A and 5Ni/CBV20A.
